# Supplementary material for: Filamentous Fungal Human Pathogens from Food Emphasising Aspergillus, Fusarium and Mucor
Source: PubMed Central journal article supplement (PMC5620635; doi:10.3390/microorganisms5030044), 2017-08-02
Supplement: microorganisms-05-00044-s001.pdf [file microorganisms-05-00044-s001.pdf]

**Table S1.** Human pathogenic filamentous fungi recorded from food. Names that are currently invalid but found in the literature are placed in square brackets for reference.

| Food Category                      | Fungi                                                                                                                                                                                                                                                                                                                                                                                                                                               |
|------------------------------------|-----------------------------------------------------------------------------------------------------------------------------------------------------------------------------------------------------------------------------------------------------------------------------------------------------------------------------------------------------------------------------------------------------------------------------------------------------|
| <b>Baked Goods</b>                 |                                                                                                                                                                                                                                                                                                                                                                                                                                                     |
| Bread                              | <i>Aspergillus flavus</i> , <i>Penicillium roqueforti</i> , <i>Wallemia sebi</i>                                                                                                                                                                                                                                                                                                                                                                    |
| Bread (baldi)                      | <i>Aspergillus fumigatus</i>                                                                                                                                                                                                                                                                                                                                                                                                                        |
| Cheesecake                         | <i>Mucor racemosus</i>                                                                                                                                                                                                                                                                                                                                                                                                                              |
| Ginger bread                       | <i>Wallemia sebi</i>                                                                                                                                                                                                                                                                                                                                                                                                                                |
| Marzipan cake                      | <i>Wallemia sebi</i>                                                                                                                                                                                                                                                                                                                                                                                                                                |
| <b>Beans</b>                       |                                                                                                                                                                                                                                                                                                                                                                                                                                                     |
| Beans (unspecified)                | <i>Alternaria alternata</i> , <i>Dichotomopilus funicola</i> [ <i>Chaetomium funicola</i> ], <i>Fusarium incarnatum</i> [ <i>F. semitectum</i> ], <i>Fusarium solani</i> , <i>Chaetomium globosum</i> [ <i>C. cochliodes</i> ], <i>C. indicum</i>                                                                                                                                                                                                   |
| Beans (black)                      | <i>Aspergillus flavus</i> , <i>Dichotomopilus funicola</i> , <i>Chaetomium brasiliense</i> , <i>C. globosum</i>                                                                                                                                                                                                                                                                                                                                     |
| Beans (mung)                       | <i>Aspergillus flavus</i> , <i>Dichotomopilus funicola</i> , <i>Chaetomium brasiliense</i> , <i>C. globosum</i> , <i>Fusarium chlamydosporum</i> , <i>F. verticillioides</i> [ <i>F. moniliforme</i> ], <i>F. proliferatum</i> , <i>Mucor circinelloides</i> , <i>Scopulariopsis brevicaulis</i> [ <i>Microascus brevicaulis</i> ], <i>Wallemia sebi</i>                                                                                            |
| Beans (velvet)                     | <i>Aspergillus flavus</i>                                                                                                                                                                                                                                                                                                                                                                                                                           |
| Beans (talo)                       | <i>Aspergillus flavus</i>                                                                                                                                                                                                                                                                                                                                                                                                                           |
| Cowpeas                            | <i>Aspergillus flavus</i> , <i>A. ochraceus</i> , <i>Fusarium equiseti</i> , <i>F. oxysporum</i> , <i>Trichoderma harzianum</i>                                                                                                                                                                                                                                                                                                                     |
| Soy products (Mejia/Noodles/Nuruk) | <i>Lichtheimia corymbifera</i> , <i>L. hyalospora</i> , <i>L. ornata</i> , <i>Scopulariopsis brevicaulis</i> , <i>Wallemia sebi</i>                                                                                                                                                                                                                                                                                                                 |
| Soybeans                           | <i>Alternaria alternata</i> , <i>Aspergillus flavus</i> , <i>A. fumigatus</i> , <i>Chaetomium brasiliense</i> , <i>C. globosum</i> , <i>Dichotomopilus funicola</i> , <i>Fusarium equiseti</i> , <i>F. incarnatum</i> , <i>F. oxysporum</i> , <i>F. solani</i> , <i>F. verticillioides</i> , <i>Mucor circinelloides</i> , <i>M. hiemalis</i> , <i>M. plumbeus</i> , <i>M. racemosus</i> , <i>Scopulariopsis brevicaulis</i> , <i>Wallemia sebi</i> |
| <b>Beverages/chocolate</b>         |                                                                                                                                                                                                                                                                                                                                                                                                                                                     |
| Beverages (pasteurised)            | <i>Paecilomyces variotii</i>                                                                                                                                                                                                                                                                                                                                                                                                                        |
| Cacao beans and leaves             | <i>Fusarium oxysporum</i> , <i>Scopulariopsis asperula</i> [ <i>Microascus niger</i> ]                                                                                                                                                                                                                                                                                                                                                              |
| Cacao beans fermenting             | <i>Mucor racemosus</i>                                                                                                                                                                                                                                                                                                                                                                                                                              |
| Cocoa                              | <i>Aspergillus fumigatus</i>                                                                                                                                                                                                                                                                                                                                                                                                                        |
| Chocolate                          | <i>Mucor hiemalis</i>                                                                                                                                                                                                                                                                                                                                                                                                                               |
| Coffee                             | <i>Microascus cinereus</i>                                                                                                                                                                                                                                                                                                                                                                                                                          |
| Coffee beans (green)               | <i>Aspergillus flavus</i> , <i>A. niger</i>                                                                                                                                                                                                                                                                                                                                                                                                         |
| Coffee: monsoon                    | <i>Aspergillus niger</i>                                                                                                                                                                                                                                                                                                                                                                                                                            |
| Tea black/green                    | <i>Chaetomium globosum</i>                                                                                                                                                                                                                                                                                                                                                                                                                          |
| <b>Cereals</b>                     |                                                                                                                                                                                                                                                                                                                                                                                                                                                     |
| Cereals/Grains                     | <i>Acremonium strictum</i> , <i>Aspergillus clavatus</i> , <i>Fusarium equiseti</i> , <i>Microascus cirrosus</i> , <i>M. manginii</i> (anamorph <i>Scopulariopsis candida</i> ), <i>M. trigonosporus</i> , <i>Mucor plumbeus</i> , <i>Paecilomyces variotii</i> , <i>Trichoderma harzianum</i> , <i>Wallemia sebi</i>                                                                                                                               |
| Barley                             | <i>Alternaria alternata</i> , <i>Al. infectoria</i> , <i>Aspergillus flavus</i> , <i>A. fumigatus</i> , <i>Dichotomopilus funicola</i> , <i>Chaetomium brasiliense</i> , <i>C. globosum</i> , <i>Curvularia lunata</i> , <i>Fusarium equiseti</i> , <i>F. oxysporum</i> , <i>Scopulariopsis brevicaulis</i> , <i>Mucor circinelloides</i> , <i>M. racemosus</i>                                                                                     |
| Buckwheat                          | <i>Microascus manginii</i>                                                                                                                                                                                                                                                                                                                                                                                                                          |

## 7 Corn/Maize

|                                |                                                                                                                                                                                                                                                                                                                                                                                                                                                                                                                                                                                     |
|--------------------------------|-------------------------------------------------------------------------------------------------------------------------------------------------------------------------------------------------------------------------------------------------------------------------------------------------------------------------------------------------------------------------------------------------------------------------------------------------------------------------------------------------------------------------------------------------------------------------------------|
|                                | <i>Acremonium strictum</i> , <i>Aspergillus flavus</i> , <i>A. niger</i> , <i>Chaetomium brasiliense</i> , <i>C. globosum</i> , <i>Curvularia lunata</i> , <i>Dichotomopilus funicola</i> , <i>Fusarium equiseti</i> , <i>F. oxysporum</i> , <i>F. graminearum</i> , <i>F. incarnatum</i> , <i>F. solani</i> , <i>F. proliferatum</i> , <i>F. verticillioides</i> , <i>Scopulariopsis brevicaulis</i> , <i>Microascus cinereus</i> , <i>M. cirrosus</i> , <i>M. manginii</i> , <i>Mucor circinelloides</i> , <i>M. hiemalis</i> <i>Trichoderma harzianum</i> , <i>Wallemia sebi</i> |
| Corn snacks                    | <i>Aspergillus fumigatus</i>                                                                                                                                                                                                                                                                                                                                                                                                                                                                                                                                                        |
| Millet                         | <i>Aspergillus flavus</i> , <i>Chaetomium globosum</i> , <i>Fusarium chlamydosporum</i>                                                                                                                                                                                                                                                                                                                                                                                                                                                                                             |
| Oats                           | <i>Aspergillus flavus</i> , <i>Scopulariopsis brevicaulis</i> , <i>Microascus cinereus</i>                                                                                                                                                                                                                                                                                                                                                                                                                                                                                          |
| Pasta                          | <i>Aspergillus flavus</i>                                                                                                                                                                                                                                                                                                                                                                                                                                                                                                                                                           |
| Rice                           | <i>Alternaria alternata</i> , <i>Amesia atrobrunnea</i> [ <i>Chaetomium atrobrunneum</i> ], <i>Aspergillus flavus</i> , <i>A. fumigatus</i> , <i>A. niger</i> , <i>Botryotrichum murorum</i> [ <i>Chaetomium murorum</i> ], <i>Chaetomium brasiliense</i> , <i>C. globosum</i> , <i>Curvularia lunata</i> , <i>Dichotomopilus funicola</i> , <i>Fusarium equiseti</i> , <i>F. oxysporum</i> , <i>F. verticillioides</i> , <i>Scopulariopsis brevicaulis</i> , <i>Wallemia sebi</i>                                                                                                  |
| Rice bran                      | <i>Aspergillus flavus</i>                                                                                                                                                                                                                                                                                                                                                                                                                                                                                                                                                           |
| Rice milled                    | <i>Aspergillus flavus</i> , <i>Microascus manginii</i> , <i>M. trigonosporus</i> , <i>Scopulariopsis brevicaulis</i>                                                                                                                                                                                                                                                                                                                                                                                                                                                                |
| Rice (parboiled)               | <i>Aspergillus fumigatus</i>                                                                                                                                                                                                                                                                                                                                                                                                                                                                                                                                                        |
| Rice (paddy)                   | <i>Aspergillus flavus</i> , <i>Curvularia lunata</i> , <i>C. pallescens</i> , <i>Fusarium incarnatum</i> , <i>F. proliferatum</i> , <i>F. solani</i> , <i>Mucor hiemalis</i> , <i>M. racemosus</i>                                                                                                                                                                                                                                                                                                                                                                                  |
| Rice (black)                   | <i>Fusarium incarnatum</i> , <i>Mucor plumbeus</i>                                                                                                                                                                                                                                                                                                                                                                                                                                                                                                                                  |
| Rye                            | <i>Alternaria infectoria</i> , <i>Fusarium equiseti</i> , <i>Paecilomyces variotii</i>                                                                                                                                                                                                                                                                                                                                                                                                                                                                                              |
| Sorghum                        | <i>Acremonium strictum</i> , <i>Alternaria alternata</i> , <i>Aspergillus flavus</i> , <i>Chaetomium brasiliense</i> , <i>C. globosum</i> , <i>C. pallescens</i> , <i>Curvularia lunata</i> , <i>Dichotomopilus funicola</i> , <i>Fusarium chlamydosporum</i> , <i>F. incarnatum</i> , <i>F. oxysporum</i> , <i>F. proliferatum</i> , <i>F. solani</i> , <i>F. verticillioides</i> , <i>Microascus trigonosporus</i> , <i>Phoma sorghina</i> , <i>Trichoderma harzianum</i>                                                                                                         |
| Wheat                          | <i>Acremonium egyptiacum</i> , <i>Alternaria alternata</i> , <i>Aspergillus flavus</i> , <i>A. fumigatus</i> , <i>Chaetomium globosum</i> , <i>Curvularia lunata</i> , <i>Fusarium equiseti</i> , <i>F. verticillioides</i> , <i>Microascus trigonosporus</i> , <i>Penicillium citrinum</i> , <i>Scopulariopsis brevicaulis</i> , <i>Wallemia sebi</i>                                                                                                                                                                                                                              |
| Wheat (fermented)              | <i>Scopulariopsis asperula</i>                                                                                                                                                                                                                                                                                                                                                                                                                                                                                                                                                      |
| Wheat-based fast food          | <i>Mucor hiemalis</i>                                                                                                                                                                                                                                                                                                                                                                                                                                                                                                                                                               |
| Wheat flour                    | <i>Aspergillus flavus</i> , <i>Microascus cinereus</i> , <i>Scopulariopsis asperula</i>                                                                                                                                                                                                                                                                                                                                                                                                                                                                                             |
| <b>Dairy/Margarine</b>         |                                                                                                                                                                                                                                                                                                                                                                                                                                                                                                                                                                                     |
| Butter                         | <i>Scopulariopsis brevicaulis</i>                                                                                                                                                                                                                                                                                                                                                                                                                                                                                                                                                   |
| Cheese                         | <i>Aspergillus flavus</i> , <i>A. versicolor</i> , <i>Fusarium verticillioides</i> , <i>Microascus manginii</i> , <i>Mucor circinelloides</i> , <i>M. hiemalis</i> , <i>M. plumbeus</i> , <i>M. racemosus</i> , <i>Paecilomyces variotii</i> , <i>Penicillium camemberti</i> , <i>P. commune</i> , <i>P. roqueforti</i> , <i>Scopulariopsis asperula</i> , <i>S. brevicaulis</i>                                                                                                                                                                                                    |
| Cheese low fat buffalo cottage | <i>Aspergillus fumigatus</i>                                                                                                                                                                                                                                                                                                                                                                                                                                                                                                                                                        |
| Cheese Processed               | <i>Aspergillus fumigatus</i>                                                                                                                                                                                                                                                                                                                                                                                                                                                                                                                                                        |
| Margarine                      | <i>Chaetomium globosum</i> , <i>Paecilomyces variotii</i>                                                                                                                                                                                                                                                                                                                                                                                                                                                                                                                           |
| Milk dried non fat             | <i>Scopulariopsis brevicaulis</i>                                                                                                                                                                                                                                                                                                                                                                                                                                                                                                                                                   |
| Milk                           | <i>Aspergillus flavus</i> , <i>Wallemia sebi</i>                                                                                                                                                                                                                                                                                                                                                                                                                                                                                                                                    |

|                                 |                                                                                                                                                                                                                                  |
|---------------------------------|----------------------------------------------------------------------------------------------------------------------------------------------------------------------------------------------------------------------------------|
| Milk condensed                  | <i>Wallemia sebi</i>                                                                                                                                                                                                             |
| Yoghurt                         | <i>Mucor circinelloides</i> f. <i>circinelloides</i> subgroup, <i>M. hiemalis</i> , <i>M. racemosus</i>                                                                                                                          |
| <b>Fruit</b>                    |                                                                                                                                                                                                                                  |
| Fruit                           | <i>Paecilomyces variotii</i>                                                                                                                                                                                                     |
| Fruit dried                     | <i>Aspergillus flavus</i> , <i>A. niger</i> , <i>Paecilomyces variotii</i>                                                                                                                                                       |
| Apples                          | <i>Alternaria alternata</i> , <i>Aspergillus niger</i> , <i>Fusarium oxysporum</i> , <i>Scopulariopsis brevicaulis</i> , <i>Trichoderma harzianum</i>                                                                            |
| Stored apples                   | <i>Acremonium strictum</i>                                                                                                                                                                                                       |
| Apple peel Lenticel             | <i>Acremonium sclerotigenum</i>                                                                                                                                                                                                  |
| Apple juice                     | <i>Mucor plumbeus</i> , <i>Scopulariopsis brevicaulis</i>                                                                                                                                                                        |
| Bananas                         | <i>Alternaria alternata</i> , <i>Acremonium strictum</i> , <i>Fusarium equiseti</i> , <i>F. incarnatum</i> , <i>F. oxysporum</i> , <i>F. proliferatum</i> , <i>F. solani</i> , <i>F. verticillioides</i> , <i>Phoma sorghina</i> |
| Banana (Latundan)               | <i>Botryotrichum murorum</i>                                                                                                                                                                                                     |
| Citrus                          | <i>Aspergillus flavus</i> , <i>Fusarium incarnatum</i> , <i>F. verticillioides</i> , <i>F. oxysporum</i> , <i>Mucor racemosus</i>                                                                                                |
| Cucurbit fruit                  | <i>Fusarium equiseti</i>                                                                                                                                                                                                         |
| Dates                           | <i>Wallemia sebi</i>                                                                                                                                                                                                             |
| Guavas                          | <i>Fusarium solani</i> , <i>Mucor hiemalis</i>                                                                                                                                                                                   |
| Grapes                          | <i>Aspergillus niger</i>                                                                                                                                                                                                         |
| Jams                            | <i>Wallemia sebi</i>                                                                                                                                                                                                             |
| Jellies                         | <i>Wallemia sebi</i>                                                                                                                                                                                                             |
| Fruit juices (UHT)              | <i>Fusarium equiseti</i> , <i>F. oxysporum</i>                                                                                                                                                                                   |
| Litches                         | <i>Aspergillus flavus</i> , <i>Curvularia lunata</i> ,                                                                                                                                                                           |
| Mangoes                         | <i>Aspergillus niger</i> , <i>Mucor circinelloides</i>                                                                                                                                                                           |
| Mango pickles                   | <i>Aspergillus fumigatus</i>                                                                                                                                                                                                     |
| Melon                           | <i>Alternaria alternata</i> , <i>Fusarium incarnatum</i> , <i>F. oxysporum</i>                                                                                                                                                   |
| Melon (musk)                    | <i>Fusarium solani</i>                                                                                                                                                                                                           |
| Oranges                         | <i>Fusarium verticillioides</i>                                                                                                                                                                                                  |
| Passion fruit                   | <i>Fusarium verticillioides</i>                                                                                                                                                                                                  |
| Pears                           | <i>Chaetomium globosum</i>                                                                                                                                                                                                       |
| Pineapples                      | <i>Aspergillus flavus</i> , <i>Fusarium verticillioides</i>                                                                                                                                                                      |
| Pomegranates                    | <i>Aspergillus flavus</i>                                                                                                                                                                                                        |
| Prunes dried                    | <i>Wallemia sebi</i>                                                                                                                                                                                                             |
| Raison                          | <i>Aspergillus niger</i>                                                                                                                                                                                                         |
| Sultanas                        | <i>Wallemia sebi</i>                                                                                                                                                                                                             |
| Tomatoes                        | <i>Alternaria alternata</i> , <i>Aspergillus flavus</i> , <i>Chaetomium globosum</i> , <i>Curvularia lunata</i> , <i>Fusarium incarnatum</i> , <i>F. equiseti</i> , <i>F. oxysporum</i>                                          |
| <b>Herbs/Spices/Truffles</b>    |                                                                                                                                                                                                                                  |
| Bishop's weed (herbal medicine) | <i>Chaetomium globosum</i>                                                                                                                                                                                                       |
| Capsicums                       | <i>Fusarium equiseti</i> , <i>F. oxysporum</i> , <i>F. solani</i>                                                                                                                                                                |
| Caraway                         | <i>Scopulariopsis brevicaulis</i>                                                                                                                                                                                                |
| Cardamom                        | <i>Fusarium verticillioides</i>                                                                                                                                                                                                  |
| Cinnamon                        | <i>Chaetomium globosum</i>                                                                                                                                                                                                       |
| Clover                          | <i>Fusarium oxysporum</i>                                                                                                                                                                                                        |
| Coriander                       | <i>Aspergillus flavus</i> , <i>Fusarium incarnatum</i> , <i>F. oxysporum</i> , <i>F. solani</i> , <i>F. verticillioides</i> , <i>Mucor plumbeus</i>                                                                              |
| Chili                           | <i>Aspergillus flavus</i> , <i>Chaetomium globosum</i> , <i>Wallemia sebi</i>                                                                                                                                                    |
| Cumin                           | <i>Achaetomium globosum</i> , <i>Chaetomium globosum</i>                                                                                                                                                                         |
| Fennel                          | <i>Chaetomium globosum</i>                                                                                                                                                                                                       |
| Fenugreek                       | <i>Fusarium verticillioides</i>                                                                                                                                                                                                  |
| Ginger                          | <i>Chaetomium globosum</i>                                                                                                                                                                                                       |
| Hops                            | <i>Scopulariopsis brevicaulis</i>                                                                                                                                                                                                |
| Peppers                         | <i>Alternaria alternata</i> , <i>Aspergillus flavus</i> , <i>Chaetomium</i>                                                                                                                                                      |

|                         |                                                                                                                                                                                                                                                                         |
|-------------------------|-------------------------------------------------------------------------------------------------------------------------------------------------------------------------------------------------------------------------------------------------------------------------|
|                         | <i>globosum, Fusarium solani, F. verticillioides, Microascus cinereus, Wallemia sebi</i>                                                                                                                                                                                |
| Pepper: black           | <i>Aspergillus flavus, A. tamarii, Chaetomium globosum, Scopulariopsis brevicaulis</i>                                                                                                                                                                                  |
| Pepper: red             | <i>Aspergillus flavus, Scopulariopsis brevicaulis</i>                                                                                                                                                                                                                   |
| Pepper: white           | <i>Chaetomium globosum</i>                                                                                                                                                                                                                                              |
| Spices                  | <i>Aspergillus flavus, A. fumigatus, Dichotomopilus funicola, Curvularia lunata</i>                                                                                                                                                                                     |
| Truffles                | <i>Fusarium oxysporum</i>                                                                                                                                                                                                                                               |
| <b>Meat/Eggs/Fish</b>   |                                                                                                                                                                                                                                                                         |
| Ham dry cured           | <i>Aspergillus flavus</i>                                                                                                                                                                                                                                               |
| Bacon                   | <i>Aspergillus flavus, Scopulariopsis brevicaulis</i>                                                                                                                                                                                                                   |
| Biltong                 | <i>Alternaria alternata, Fusarium verticillioides, Scopulariopsis brevicaulis</i>                                                                                                                                                                                       |
| Eggs                    | <i>Scopulariopsis asperula, S. brevicaulis</i>                                                                                                                                                                                                                          |
| Eggs stored             | <i>Aspergillus fumigatus</i>                                                                                                                                                                                                                                            |
| Fish meal               | <i>Acremonium sclerotigenum, Scopulariopsis brevicaulis</i>                                                                                                                                                                                                             |
| Fish dried              | <i>Aspergillus fumigatus</i>                                                                                                                                                                                                                                            |
| Fish dried/smoked/cured | <i>Aspergillus flavus</i>                                                                                                                                                                                                                                               |
| Fish dried salt         | <i>Aspergillus flavus, Wallemia sebi</i>                                                                                                                                                                                                                                |
| Ham                     | <i>Scopulariopsis brevicaulis</i>                                                                                                                                                                                                                                       |
| Meat                    | <i>Mucor circinelloides</i>                                                                                                                                                                                                                                             |
| Meat (cold/frozen)      | <i>Alternaria alternata</i>                                                                                                                                                                                                                                             |
| Meat cured              | <i>Aspergillus fumigatus</i>                                                                                                                                                                                                                                            |
| Meat dried cured        | <i>Penicillium commune</i>                                                                                                                                                                                                                                              |
| Meat processed          | <i>Aspergillus fumigatus, Mucor racemosus</i>                                                                                                                                                                                                                           |
| Meat products           | <i>Paecilomyces variotii, Wallemia sebi</i>                                                                                                                                                                                                                             |
| Meat smoked             | <i>Aspergillus flavus</i>                                                                                                                                                                                                                                               |
| Meat dried              | <i>Aspergillus niger</i>                                                                                                                                                                                                                                                |
| Meat salted horse       | <i>Mucor racemosus</i>                                                                                                                                                                                                                                                  |
| Salmon                  | <i>Trichoderma harzianum</i>                                                                                                                                                                                                                                            |
| Salami                  | <i>Acremonium strictum, Scopulariopsis brevicaulis</i>                                                                                                                                                                                                                  |
| Suet                    | <i>Wallemia sebi</i>                                                                                                                                                                                                                                                    |
| <b>Nuts/Seeds</b>       |                                                                                                                                                                                                                                                                         |
| Almonds                 | <i>Aspergillus flavus, A. niger</i>                                                                                                                                                                                                                                     |
| Betel                   | <i>Aspergillus flavus</i>                                                                                                                                                                                                                                               |
| Brazil nuts             | <i>Acremonium recifei, Aspergillus flavus</i>                                                                                                                                                                                                                           |
| Cashew nuts             | <i>Chaetomium brasiliense, C. globosum, Dichotomopilus funicola</i>                                                                                                                                                                                                     |
| Candle nuts             | <i>Chaetomium globosum</i>                                                                                                                                                                                                                                              |
| Coconuts                | <i>Aspergillus flavus</i>                                                                                                                                                                                                                                               |
| Copra                   | <i>Aspergillus flavus, A. fumigatus, Chaetomium brasiliense, C. globosum, Dichotomopilus funicola</i>                                                                                                                                                                   |
| Hazelnuts               | <i>Alternaria alternata, Aspergillus fumigatus, A. flavus, A. niger, Chaetomium globosum, Curvularia lunata, Fusarium oxysporum, F. verticillioides, Mucor circinelloides, M. hiemalis</i>                                                                              |
| Kemiri nuts             | <i>Aspergillus flavus, Chaetomium globosum</i>                                                                                                                                                                                                                          |
| Kola nuts               | <i>Aspergillus flavus, Fusarium verticillioides</i>                                                                                                                                                                                                                     |
| Tree nuts               | <i>Aspergillus flavus</i>                                                                                                                                                                                                                                               |
| Nuts                    | <i>Acremonium strictum, Aspergillus flavus, Chaetomium brasiliense, C. globosum, Dichotomopilus funicola, Mucor plumbeus, Paecilomyces variotii, Trichoderma harzianum</i>                                                                                              |
| Peanuts                 | <i>Alternaria alternata, Aspergillus fumigatus, A. flavus, A. niger, Chaetomium brasiliense, C. globosum, Dichotomopilus funicola, Curvularia lunata, Fusarium chlamydosporum, F. equiseti, F. incarnatum, F. oxysporum, F. solani, F. verticillioides, Lichtheimia</i> |

|                      |                                                                                                                                                                                                          |
|----------------------|----------------------------------------------------------------------------------------------------------------------------------------------------------------------------------------------------------|
|                      | <i>corymbifera</i> , <i>Microascus cinereus</i> , <i>Scopulariopsis brevicaulis</i> , <i>Trichoderma harzianum</i> , <i>Wallemia sebi</i>                                                                |
| Pecans               | <i>Alternaria alternata</i> , <i>Aspergillus flavus</i> , <i>Fusarium chlamydosporum</i> , <i>F. oxysporum</i> , <i>F. verticillioides</i> , <i>Microascus trigonosporus</i> , <i>Wallemia sebi</i>      |
| Pistachios           | <i>Aspergillus flavus</i> , <i>A. niger</i> , <i>A. tamarii</i>                                                                                                                                          |
| Walnuts              | <i>Aspergillus fumigatus</i> , <i>A. flavus</i> , <i>A. niger</i> , <i>Chaetomium globosum</i> , <i>Curvularia lunata</i> , <i>Fusarium equiseti</i> , <i>F. oxysporum</i> , <i>Mucor circinelloides</i> |
| <b>Seeds</b>         |                                                                                                                                                                                                          |
| Amaranth             | <i>Aspergillus flavus</i> , <i>Fusarium verticillioides</i>                                                                                                                                              |
| Cucumber             | <i>Dichotomopilus funicola</i> , <i>Chaetomium globosum</i> , <i>Botryotrichum murorum</i>                                                                                                               |
| Legume               | <i>Microascus trigonosporus</i>                                                                                                                                                                          |
| Melon                | <i>Aspergillus fumigatus</i>                                                                                                                                                                             |
| Oilseed              | <i>Aspergillus flavus</i> , <i>A. fumigatus</i> , <i>Fusarium equiseti</i>                                                                                                                               |
| Palm oil             | <i>Fusarium oxysporum</i>                                                                                                                                                                                |
| Pea                  | <i>Dichotomopilus funicola</i> , <i>Botryotrichum murorum</i> , <i>Chaetomium globosum</i> , <i>Microascus cirrosus</i>                                                                                  |
| Pine                 | <i>Scopulariopsis brevicaulis</i>                                                                                                                                                                        |
| Pumpkin              | <i>Botryotrichum murorum</i> , <i>Chaetomium globosum</i>                                                                                                                                                |
| Rape                 | <i>Alternaria alternata</i> , <i>Aspergillus flavus</i> , <i>Wallemia sebi</i>                                                                                                                           |
| Safflower            | <i>Chaetomium globosum</i>                                                                                                                                                                               |
| Sesame               | <i>Aspergillus flavus</i> , <i>Dichotomopilus funicola</i> , <i>Fusarium solani</i>                                                                                                                      |
| Sunflower            | <i>Aspergillus flavus</i> , <i>A. niger</i> , <i>Fusarium incarnatum</i> , <i>F. solani</i> , <i>F. verticillioides</i> , <i>Scopulariopsis brevicaulis</i>                                              |
| <b>Vegetables</b>    |                                                                                                                                                                                                          |
| Asparagus            | <i>Fusarium verticillioides</i>                                                                                                                                                                          |
| Cabbage              | <i>Fusarium oxysporum</i>                                                                                                                                                                                |
| Carrots              | <i>Mucor hiemalis</i>                                                                                                                                                                                    |
| Cassava              | <i>Aspergillus flavus</i> , <i>Fusarium solani</i> , <i>Mucor hiemalis</i>                                                                                                                               |
| Cassava rotting      | <i>Trichoderma harzianum</i>                                                                                                                                                                             |
| Cauliflowers         | <i>Alternaria alternata</i>                                                                                                                                                                              |
| Cucumber             | <i>Alternaria alternata</i> , <i>Fusarium incarnatum</i> , <i>F. oxysporum</i>                                                                                                                           |
| Dates                | <i>Fusarium oxysporum</i>                                                                                                                                                                                |
| Eggplant (aubergine) | <i>Alternaria alternata</i> , <i>Dichotomopilus funicola</i>                                                                                                                                             |
| Garlic               | <i>Fusarium oxysporum</i> , <i>F. solani</i> , <i>F. verticillioides</i>                                                                                                                                 |
| Linseed              | <i>Botryotrichum murorum</i> , <i>Chaetomium globosum</i> , <i>Dichotomopilus funicola</i>                                                                                                               |
| Maple syrup          | <i>Wallemia sebi</i>                                                                                                                                                                                     |
| Oils                 | <i>Paecilomyces variotii</i>                                                                                                                                                                             |
| Okra                 | <i>Chaetomium globosum</i>                                                                                                                                                                               |
| Olives               | <i>Aspergillus flavus</i> , <i>A. versicolor</i>                                                                                                                                                         |
| Olive paste          | <i>Lichtheimia corymbifera</i>                                                                                                                                                                           |
| Onions               | <i>Aspergillus niger</i> , <i>Microascus trigonosporus</i>                                                                                                                                               |
| Onion dried          | <i>Aspergillus fumigatus</i>                                                                                                                                                                             |
| Peas                 | <i>Alternaria alternata</i> , <i>Acremonium strictum</i> , <i>Fusarium oxysporum</i> , <i>F. solani</i> , <i>Trichoderma harzianum</i>                                                                   |
| Peas (chick)         | <i>Aspergillus flavus</i>                                                                                                                                                                                |
| Peas (pigeon)        | <i>Aspergillus flavus</i> , <i>Fusarium incarnatum</i>                                                                                                                                                   |
| Peas dried           | <i>Wallemia sebi</i>                                                                                                                                                                                     |
| Potatoes             | <i>Alternaria alternata</i> , <i>Fusarium incarnatum</i> , <i>F. oxysporum</i> , <i>F. solani</i> , <i>Mucor racemosus</i>                                                                               |
| Radish               | <i>Dichotomopilus funicola</i>                                                                                                                                                                           |
| Squash               | <i>Fusarium solani</i>                                                                                                                                                                                   |
| Sugar beets          | <i>Fusarium solani</i>                                                                                                                                                                                   |

|                      |                                                                                  |
|----------------------|----------------------------------------------------------------------------------|
| Seeds                | <i>Paecilomyces variotii</i>                                                     |
| Sugarcane            | <i>Chaetomium globosum</i>                                                       |
| Sweet potatoes       | <i>Fusarium oxysporum</i> , <i>F. solani</i> , <i>Mucor racemosus</i>            |
| Vegetables (fresh)   | <i>Acremonium strictum</i> , <i>Alternaria alternata</i> , <i>Mucor hiemalis</i> |
| Vegetables (tropics) | <i>Aspergillus fumigatus</i>                                                     |
| Yams                 | <i>Fusarium solani</i> , <i>F. verticillioides</i> , <i>Mucor circinelloides</i> |
| Yam chips            | <i>Aspergillus flavus</i> , <i>A. niger</i>                                      |
